# Supplementary material
Source: PubMed Central journal article supplement (PMC8675601)
Supplement: NIHMS1753445-supplement-Data_File_S2.pdf [file NIHMS1753445-supplement-Data_File_S2.pdf]

| var1                                                   | var2                                                   | value.r  | value.p  |
|--------------------------------------------------------|--------------------------------------------------------|----------|----------|
| Survival                                               | survival.index                                         | 0.661215 | 0.026704 |
| Survival                                               | Time.of.death                                          | 0.939336 | 8.01E-07 |
| survival.index                                         | Time.of.death                                          | 0.63789  | 0.034469 |
| Survival                                               | Clinical.Score.max                                     | -0.69338 | 0.019352 |
| survival.index                                         | Clinical.Score.max                                     | -0.87977 | 1.01E-04 |
| Time.of.death                                          | Clinical.Score.max                                     | -0.62526 | 0.038289 |
| Serum.Neut.titer.d24                                   | GP.binding.BLI.d26                                     | 0.627256 | 0.037275 |
| Survival                                               | GP.binding.BLI.d54                                     | 0.611527 | 0.045674 |
| survival.index                                         | GP.binding.BLI.d54                                     | 0.645599 | 0.033251 |
| Time.of.death                                          | GP.binding.BLI.d54                                     | 0.605905 | 0.047361 |
| Clinical.Score.max                                     | GP.binding.BLI.d54                                     | -0.63893 | 0.034242 |
| Serum.Neut.titer.d56                                   | GP.binding.BLI.d54                                     | 0.621053 | 0.03911  |
| Serum.Neut.titer.d24                                   | sGP.binding.BLI.d26                                    | 0.605627 | 0.047361 |
| GP.binding.BLI.d26                                     | sGP.binding.BLI.d26                                    | 0.726316 | 0.011334 |
| Serum.Neut.titer.d56                                   | sGP.binding.BLI.d54                                    | 0.652632 | 0.0301   |
| GP.binding.BLI.d54                                     | sGP.binding.BLI.d54                                    | 0.736842 | 0.009971 |
| GP.binding.BLI.d26                                     | GPcl.binding.BLI.d26                                   | 0.631579 | 0.034625 |
| sGP.binding.BLI.d26                                    | GPcl.binding.BLI.d26                                   | 0.736842 | 0.009971 |
| GP.binding.BLI.d54                                     | GPcl.binding.BLI.d54                                   | 0.705263 | 0.016213 |
| sGP.binding.BLI.d54                                    | GPcl.binding.BLI.d54                                   | 0.715789 | 0.013072 |
| GPcl.binding.BLI.d26                                   | GPcl.binding.BLI.d54                                   | 0.6      | 0.049335 |
| Serum.Neut.titer.d24                                   | Mab.Comp.RBD.520.d26                                   | 0.605627 | 0.047361 |
| GP.binding.BLI.d26                                     | Mab.Comp.RBD.520.d26                                   | 0.747368 | 0.008476 |
| sGP.binding.BLI.d26                                    | Mab.Comp.RBD.520.d26                                   | 0.705263 | 0.016213 |
| GPcl.binding.BLI.d26                                   | Mab.Comp.RBD.520.d26                                   | 0.715789 | 0.013072 |
| Serum.Neut.titer.d24                                   | Mab.Comp.GC.BDBV289.d26                                | 0.6597   | 0.026704 |
| GP.binding.BLI.d26                                     | Mab.Comp.GC.BDBV289.d26                                | 0.831579 | 8.68E-04 |
| sGP.binding.BLI.d26                                    | Mab.Comp.GC.BDBV289.d26                                | 0.726316 | 0.011334 |
| GPcl.binding.BLI.d26                                   | Mab.Comp.GC.BDBV289.d26                                | 0.673684 | 0.024818 |
| Mab.Comp.RBD.520.d26                                   | Mab.Comp.GC.BDBV289.d26                                | 0.810526 | 0.001737 |
| Clinical.Score.max                                     | Mab.Comp.GC.BDBV289.d54                                | -0.60408 | 0.048217 |
| GP.binding.BLI.d26                                     | Mab.Comp.Trimer.KZ52.d26                               | 0.828499 | 8.68E-04 |
| sGP.binding.BLI.d26                                    | Mab.Comp.Trimer.KZ52.d26                               | 0.701849 | 0.016625 |
| GPcl.binding.BLI.d26                                   | Mab.Comp.Trimer.KZ52.d26                               | 0.691295 | 0.019352 |
| Mab.Comp.RBD.520.d26                                   | Mab.Comp.Trimer.KZ52.d26                               | 0.796837 | 0.002741 |
| Mab.Comp.GC.BDBV289.d26                                | Mab.Comp.Trimer.KZ52.d26                               | 0.849607 | 5.05E-04 |
| GP.binding.BLI.d26                                     | Mab.Comp.MPER.223.d26                                  | 0.649079 | 0.031938 |
| sGP.binding.BLI.d26                                    | Mab.Comp.MPER.223.d26                                  | 0.670187 | 0.025726 |
| GPcl.binding.BLI.d26                                   | Mab.Comp.MPER.223.d26                                  | 0.701849 | 0.016625 |
| Mab.Comp.RBD.520.d26                                   | Mab.Comp.MPER.223.d26                                  | 0.691295 | 0.019352 |
| Mab.Comp.GC.BDBV289.d26                                | Mab.Comp.MPER.223.d26                                  | 0.617416 | 0.041472 |
| Serum.Neut.titer.d56                                   | Mab.Comp.MPER.223.d54                                  | 0.610526 | 0.045674 |
| GP.binding.BLI.d54                                     | Mab.Comp.MPER.223.d54                                  | 0.757895 | 0.006831 |
| sGP.binding.BLI.d26                                    | Mab.Comp.MPER.223.d54                                  | 0.684211 | 0.021839 |
| sGP.binding.BLI.d54                                    | Mab.Comp.MPER.223.d54                                  | 0.684211 | 0.021839 |
| GPcl.binding.BLI.d54                                   | Mab.Comp.MPER.223.d54                                  | 0.631579 | 0.034625 |
| Mab.Comp.RBD.520.d54                                   | Mab.Comp.MPER.223.d54                                  | 0.631579 | 0.034625 |
| Serum.Neut.titer.d24                                   | Mab.Comp.MPER.317.d26                                  | 0.6597   | 0.026704 |
| GP.binding.BLI.d26                                     | Mab.Comp.MPER.317.d26                                  | 0.621053 | 0.03911  |
| sGP.binding.BLI.d26                                    | Mab.Comp.MPER.317.d26                                  | 0.726316 | 0.011334 |
| GPcl.binding.BLI.d26                                   | Mab.Comp.MPER.317.d26                                  | 0.736842 | 0.009971 |
| Mab.Comp.RBD.520.d26                                   | Mab.Comp.MPER.317.d26                                  | 0.789474 | 0.003302 |
| Mab.Comp.GC.BDBV289.d26                                | Mab.Comp.MPER.317.d26                                  | 0.747368 | 0.008476 |
| Mab.Comp.Trimer.KZ52.d26                               | Mab.Comp.MPER.317.d26                                  | 0.670187 | 0.025726 |
| Mab.Comp.MPER.223.d26                                  | Mab.Comp.MPER.317.d26                                  | 0.722958 | 0.011978 |
| GP.binding.BLI.d54                                     | Mab.Comp.MPER.317.d54                                  | 0.652632 | 0.0301   |
| sGP.binding.BLI.d26                                    | Mab.Comp.MPER.317.d54                                  | 0.642105 | 0.033251 |
| sGP.binding.BLI.d54                                    | Mab.Comp.MPER.317.d54                                  | 0.663158 | 0.026704 |
| Mab.Comp.RBD.520.d54                                   | Mab.Comp.MPER.317.d54                                  | 0.631579 | 0.034625 |
| Mab.Comp.MPER.223.d54                                  | Mab.Comp.MPER.317.d54                                  | 0.831579 | 8.68E-04 |
| Mab.Comp.MPER.317.d26                                  | Mab.Comp.MPER.317.d54                                  | 0.621053 | 0.03911  |
| GP.binding.BLI.d54                                     | Proportion.binding.to.RBD.GC.GP2.d54.GPmuc.immobilized | 0.6      | 0.049335 |
| Mab.Comp.GC.BDBV289.d54                                | Proportion.binding.to.RBD.GC.GP2.d54.GPmuc.immobilized | 0.6      | 0.049335 |
| survival.index                                         | Proportion.binding.to.RBD.d54.GPcl.immobilized.vs.sGP. | 0.638926 | 0.034242 |
| Proportion.binding.to.RBD.GC.GP2.d54.GPmuc.immobilized | Proportion.binding.to.RBD.d54.GPcl.immobilized.vs.sGP. | 0.673884 | 0.024818 |
| Restoration.of.infectivity.Gpmuc.2ug                   | Restoration.of.infectivity.sGP.2ug                     | 0.673684 | 0.024818 |
| survival.index                                         | ADCD.d54.0.004.dilution                                | 0.668059 | 0.026434 |
| Clinical.Score.max                                     | ADCD.d54.0.004.dilution                                | -0.66216 | 0.026704 |
| Serum.Neut.titer.d56                                   | ADCD.d54.0.004.dilution                                | 0.673684 | 0.024818 |
| GP.binding.BLI.d54                                     | ADCD.d54.0.004.dilution                                | 0.778947 | 0.004467 |
| sGP.binding.BLI.d54                                    | ADCD.d54.0.004.dilution                                | 0.768421 | 0.00551  |
| GPcl.binding.BLI.d54                                   | ADCD.d54.0.004.dilution                                | 0.673684 | 0.024818 |
| Mab.Comp.GC.BDBV289.d54                                | ADCD.d54.0.004.dilution                                | 0.631579 | 0.034625 |
| Mab.Comp.MPER.223.d54                                  | ADCD.d54.0.004.dilution                                | 0.642105 | 0.033251 |
| Mab.Comp.MPER.317.d54                                  | ADCD.d54.0.004.dilution                                | 0.6      | 0.049335 |
| Proportion.binding.to.RBD.GC.GP2.d54.GPmuc.immobilized | ADCD.d54.0.004.dilution                                | 0.715789 | 0.013072 |
| Proportion.binding.to.RBD.d54.GPcl.immobilized.vs.sGP. | ADCD.d54.0.004.dilution                                | 0.641794 | 0.033251 |
| survival.index                                         | ADNP.d54.0.0004.dilution                               | 0.634371 | 0.034625 |
| Clinical.Score.max                                     | ADNP.d54.0.0004.dilution                               | -0.66216 | 0.026704 |
| Serum.Neut.titer.d56                                   | ADNP.d54.0.0004.dilution                               | 0.663158 | 0.026704 |
| GP.binding.BLI.d54                                     | ADNP.d54.0.0004.dilution                               | 0.768421 | 0.00551  |
| sGP.binding.BLI.d54                                    | ADNP.d54.0.0004.dilution                               | 0.757895 | 0.006831 |
| GPcl.binding.BLI.d54                                   | ADNP.d54.0.0004.dilution                               | 0.642105 | 0.033251 |
| Mab.Comp.GC.BDBV289.d54                                | ADNP.d54.0.0004.dilution                               | 0.663158 | 0.026704 |
| Mab.Comp.MPER.223.d54                                  | ADNP.d54.0.0004.dilution                               | 0.694737 | 0.019352 |
| Mab.Comp.MPER.317.d54                                  | ADNP.d54.0.0004.dilution                               | 0.631579 | 0.034625 |
| Proportion.binding.to.RBD.GC.GP2.d54.GPmuc.immobilized | ADNP.d54.0.0004.dilution                               | 0.726316 | 0.011334 |
| Proportion.binding.to.RBD.d54.GPcl.immobilized.vs.sGP. | ADNP.d54.0.0004.dilution                               | 0.609704 | 0.045865 |
| Serum.IgG.d54                                          | ADNP.d54.0.0004.dilution                               | 0.6      | 0.049335 |
| ADCD.d54.0.004.dilution                                | ADNP.d54.0.0004.dilution                               | 0.926316 | 2.20E-06 |
| GP.binding.BLI.d54                                     | ADCP.d54.0.0001.dilution                               | 0.642105 | 0.033251 |
| Mab.Comp.MPER.223.d54                                  | ADCP.d54.0.0001.dilution                               | 0.610526 | 0.045674 |
| Mab.Comp.MPER.317.d54                                  | ADCP.d54.0.0001.dilution                               | 0.631579 | 0.034625 |
| Serum.IgA.d54                                          | ADCP.d54.0.0001.dilution                               | 0.621053 | 0.03911  |
| Serum.IgG.d54                                          | ADCP.d54.0.0001.dilution                               | 0.642105 | 0.033251 |
| ADCP.d54.0.0001.dilution                               | MLD.IgG.Peptide.Breadth                                | 0.623273 | 0.03911  |
| Serum.IgA.d54                                          | MLD.IgA.Peptide.Breadth                                | 0.607943 | 0.046876 |
| Serum.IgA.d54                                          | GP1.C.term.IgA.Peptide.Breadth                         | 0.635358 | 0.034625 |
| GP1.C.term.IgG.Peptide.Breadth                         | GP1.C.term.IgA.Peptide.Breadth                         | 0.659854 | 0.026704 |
